# Supplementary material
Source: publisher site journal article supplement (https://www.dovepress.com/get_supplementary_file.php?f=467963.docx)
Supplement: Supplementary file 1 [file get_supplementary_file.php]

Supplementary file 1.

**Survey on the Gynecological Day Surgery Center - Pre-Operative Appointment Questionnaire (Face to face Patient Version)**

Dear Lady, based on your experience in the day surgery ward, please help us complete this survey to continuously improve our work. This is an internal survey, and we will keep your information confidential. Thank you for your cooperation and support.

How do you feel about this visit to the hospital, making an appointment for surgery overall?

Very satisfied Fairly satisfied Average Fairly unsatisfied Unsatisfied

Regarding the preoperative examination and appointment process when visiting the hospital, were you satisfied with the doctor's guidance?

Very satisfied Fairly satisfied Average Fairly unsatisfied Unsatisfied

Regarding the doctor's guidance for preoperative examination and appointment, which method do you prefer? (Multiple choices possible)

Watching videos Phone call with doctor Video call with doctor Communicating through text or pictures online Voice communication online Other ____________________

Regarding pre-operative preparation education, was the nurse's guidance clear and easy to understand?

Completely understandable

Mostly understandable

Only a small part was understandable

Completely un-understandable

How many times did you visit the hospital to make an appointment for this surgery, from outpatient diagnosis, preoperative examination to successful surgery appointment? times.

Among them, the local hospital _____ times, Zhejiang University Affiliated Women's Hospital _____ times

How much time did you spend on making this surgery appointment at our hospital (in minutes)? , including transportation time (round trip) , time in hospital , time for accommodation , mealtime ,

Other

How much money did you spend on making this surgery appointment at our hospital (in yuan)? , transportation costs (round trip) , in-hospital costs , accommodation costs , meal costs , wages lost due to taking leave for treatment

Other

The following two items are for those who had their examination at other hospitals. If not, please ignore.

8. How much time did you spend on making this surgery appointment at the other hospital (in minutes)? , including transportation time (round trip) , time in hospital , time for accommodation , mealtime ,

Other

How much money did you spend on making this surgery appointment at the other hospital (in yuan)? , transportation costs (round trip) , in-hospital costs (registration fee, test fee) , accommodation costs , meal costs , wages lost due to taking leave for treatment

Other

What suggestions or comments do you currently have for the preoperative examination assessment and surgery appointment process?

**Survey on Gynecological Day Surgery Center - Pre-operative Questionnaire (Telemedicine Patient Version)**

Dear Madam, please help us to fill in this questionnaire based on your experience at the day surgery center, to continuously improve our work. This survey is internal, we will keep your information confidential. Thank you for your cooperation and support.

How do you feel about the overall experience of this visit, appointment, and surgery?

Very satisfied Fairly satisfied Average Somewhat unsatisfied Not satisfied

Are you satisfied with the guidance of the doctor for the preoperative examination and appointment process?

Very satisfied Fairly satisfied Average Somewhat unsatisfied Not satisfied

What type of guidance do you prefer for the doctor's preoperative examination and appointment? (Multiple choices allowed)

Video viewing Phone communication with the doctor Video connection with the doctor Online text or image communication Online voice communication Other ____________________

Is the nurse's guidance for preoperative preparation clear and easy to understand?

Completely understandable

Mostly understandable

Only a small part is understandable

Completely ununderstandable

How many times have you visited the hospital from outpatient visit, preoperative examination to successful surgery appointment? times.

Among them, the local hospital _____ times, Zhejiang University Affiliated Obstetrics and Gynecology Hospital _____ times

The total time you need to spend for this surgery appointment at our hospital (minutes) , including transportation time (round trip) , time spent in the hospital , accommodation time , mealtime , others

The total cost of this surgery appointment at our hospital (yuan) , transportation cost (round trip) , cost inside the hospital , accommodation cost , meal cost , wages lost due to leave for medical treatment

other

The following two items are for those who went to other hospitals for examination. If not, please ignore.

8. The total time you need to spend for this surgery appointment at other hospitals (minutes) , including transportation time (round trip) , time spent in the hospital , accommodation time , mealtime , others

The total cost of this surgery appointment at other hospitals (yuan) , transportation cost (round trip) , cost inside the hospital (registration fee, test fee) , accommodation cost , meal cost , wages lost due to leave for medical treatment

other

What suggestions or comments do you have for the preoperative examination assessment and surgery appointment process?
